# Supplementary material for: Impact of coating type on structure and magnetic properties of biocompatible iron oxide nanoparticles: insights into cluster organization and oxidation stability
Source: Royal Society of Chemistry journal article supplement (doi:10.1039/d4cp01735h), 2024-01-01
Supplement: d4cp01735h2.pdf [file d4cp01735h2.pdf]

### Supporting Information

#### Impact of Coating Type on Structure and Magnetic Properties of Biocompatible Iron Oxide Nanoparticles: Insights into Cluster Organization and Oxidation Stability

Amal Nasser<sup>1,2</sup>, Asmaa Qdemat<sup>3</sup>, Harald Unterweger<sup>4</sup>, Rainer Tietze<sup>4</sup>, Xiao Sun<sup>5</sup>, Joachim Landers<sup>6</sup>, Juri Kopp<sup>6</sup>, Baohu Wu<sup>2</sup>, Marie-Sousai Appavou<sup>2</sup>, Anastasiia Murmiliuk<sup>2</sup>, Elliot Paul Gilbert<sup>7</sup>, Oleg Petravic<sup>3</sup>, Artem Feoktystov<sup>2</sup>

<sup>1</sup>Department of Physics, Technical University Munich (TUM), Garching, Germany

<sup>2</sup>Forschungszentrum Jülich GmbH, Jülich Centre for Neutron Science JCNS at MLZ, Garching, Germany

<sup>3</sup>Forschungszentrum Jülich GmbH, Jülich Centre for Neutron Science JCNS-2, Jülich, Germany

<sup>4</sup>ENT Department, Section of Experimental Oncology and Nanomedicine (SEON), Else Kroener-Fresenius-Stiftung-Professorship, University Hospital Erlangen, Germany

<sup>5</sup>Deutsches Elektronen-Synchrotron DESY, 22607 Hamburg, Germany

<sup>6</sup>Faculty of Physics and Center for Nanointegration Duisburg-Essen (CENIDE), University of Duisburg-Essen, D-47057 Duisburg, Germany

<sup>7</sup>Australian Centre for Neutron Scattering, Australian Nuclear Science and Technology Organisation, Lucas Heights NSW 2234, Australia

## Morphology and Structure

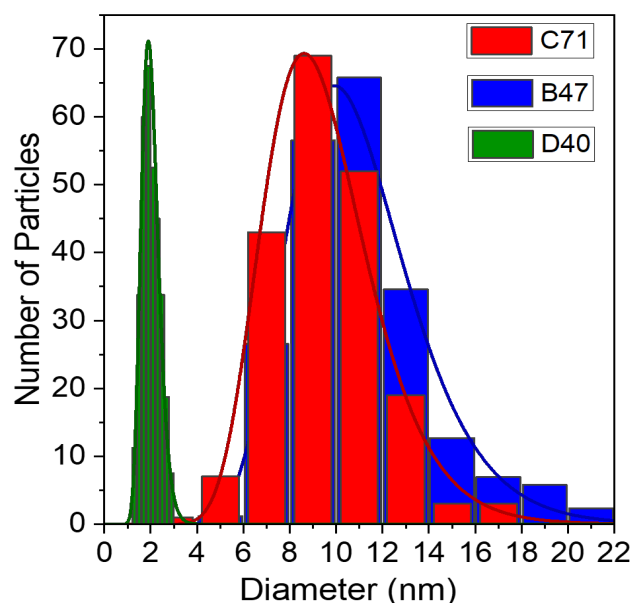

Figure 1: Histogram and log-normal fit of single cores distribution determined by TEM for the C71, B47, and D40 samples.

Table 1: The hydrodynamic size, polydispersity index (PDI), and Zeta potential (mV) for the C71, B47, and D40 samples.

| Coating Material | Code | Hydrodynamic Size(nm) | PDI(a.u.) | Zeta Potential (mV) |
|------------------|------|-----------------------|-----------|---------------------|
| Citrate          | C71  | 67                    | 0.258     | -49                 |
| APTES            | B47  | 201                   | 0.251     | 43                  |
| Dextran          | D40  | 37                    | 0.216     | -4                  |

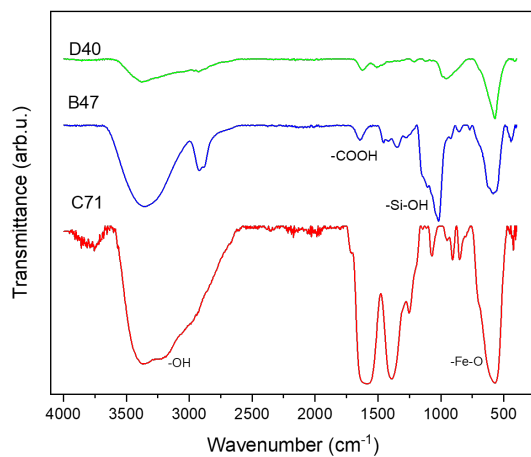

Figure 2: FT-IR spectra for the C71, B47, and D40 samples.

## Aging Study

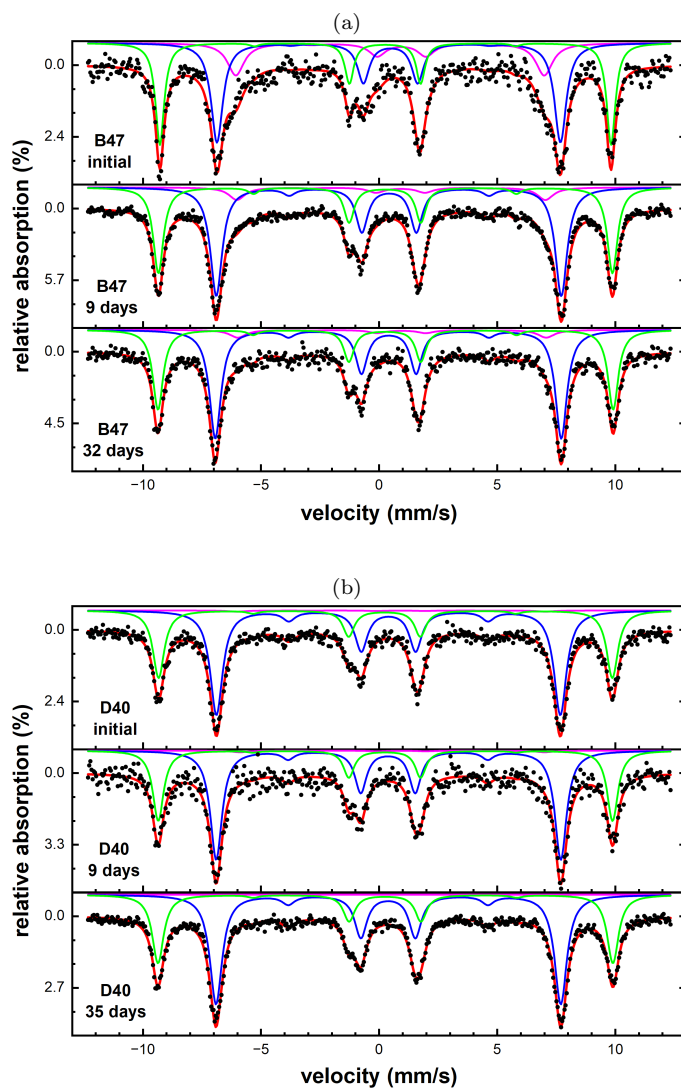

Figure 3: Mössbauer spectra for (a) sample B47 and (b) sample D40 after various aging times of exposure to air.

# Magnetic Size Determination

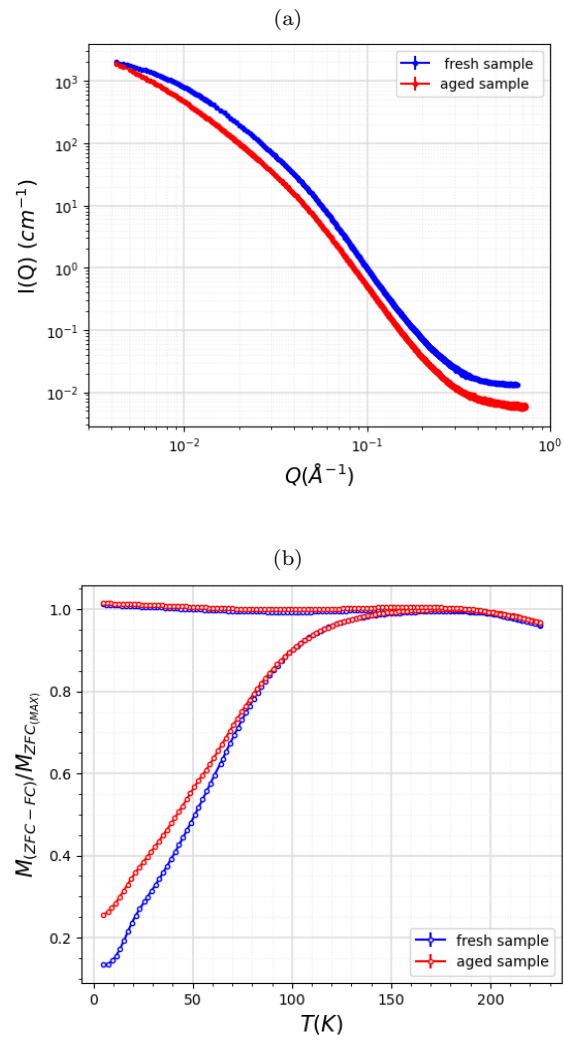

Figure 4: (a) SAXS curves, and (b) normalized ZFC/FC curves of the fresh sample and after 6 months from preparation for the C71 sample.
