# Supplementary figures and images for: Impact of coating type on structure and magnetic properties of biocompatible iron oxide nanoparticles: insights into cluster organization and oxidation stability
Source: Royal Society of Chemistry journal article supplement (doi:10.1039/d4cp01735h), 2024-01-01

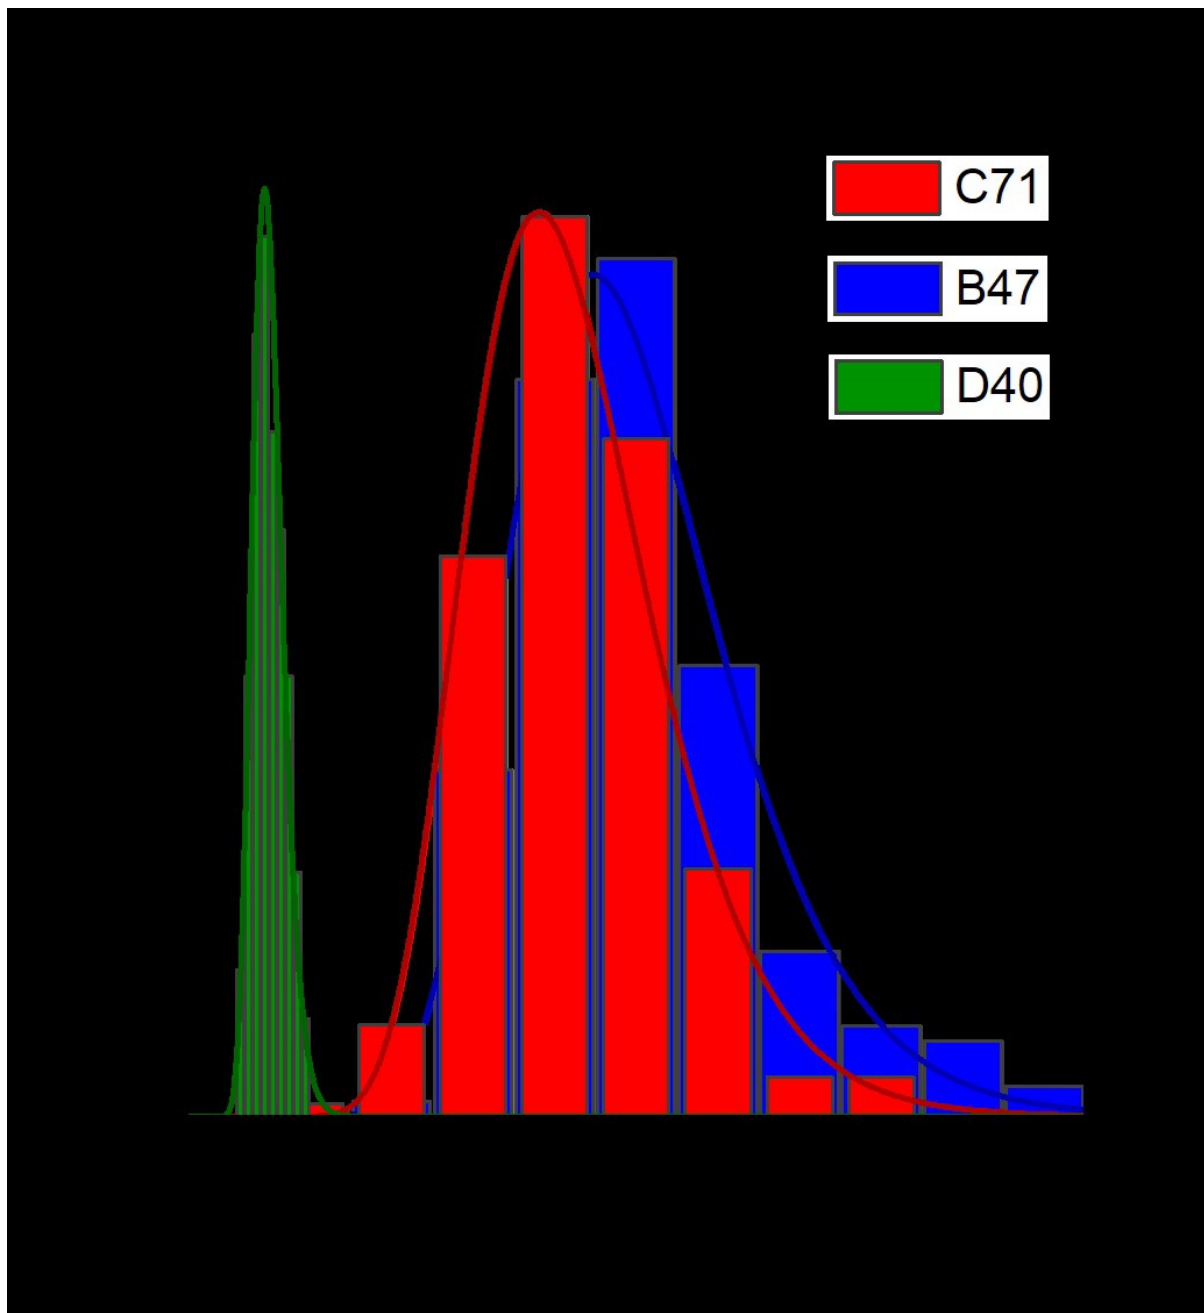

Supplement: d4cp01735h3.pdf [file d4cp01735h3.pdf]

(a)

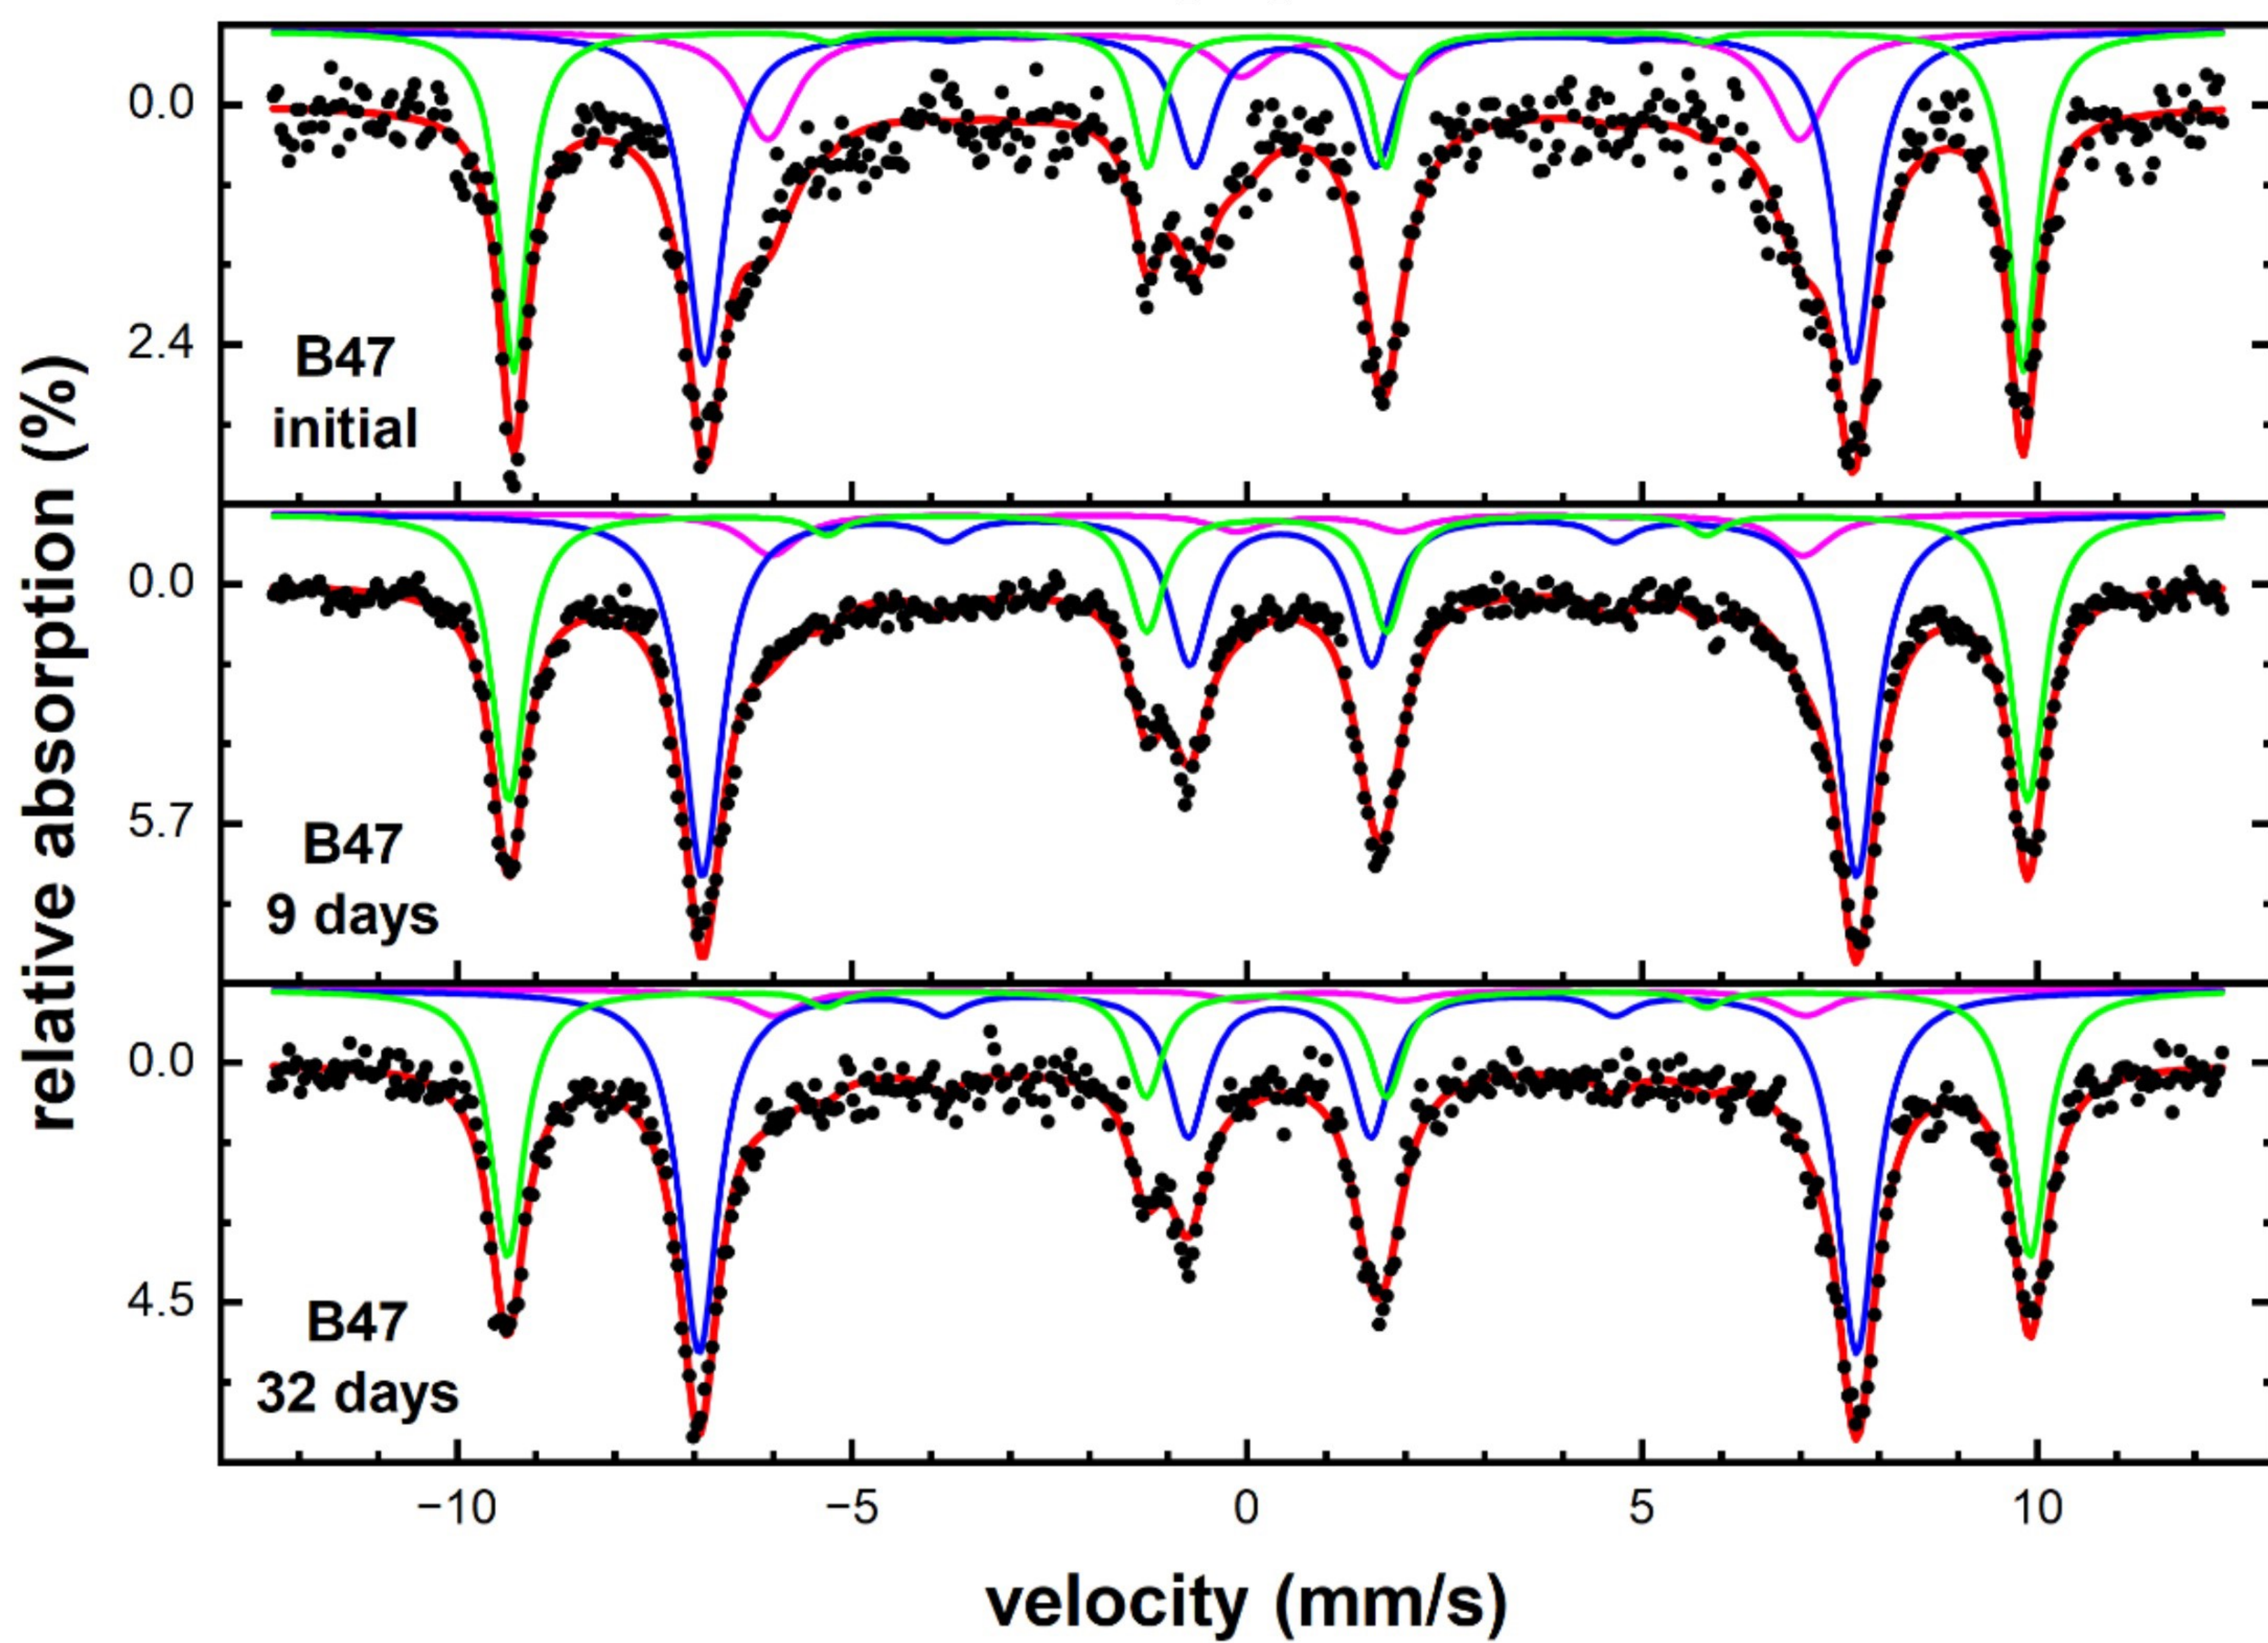

(b)

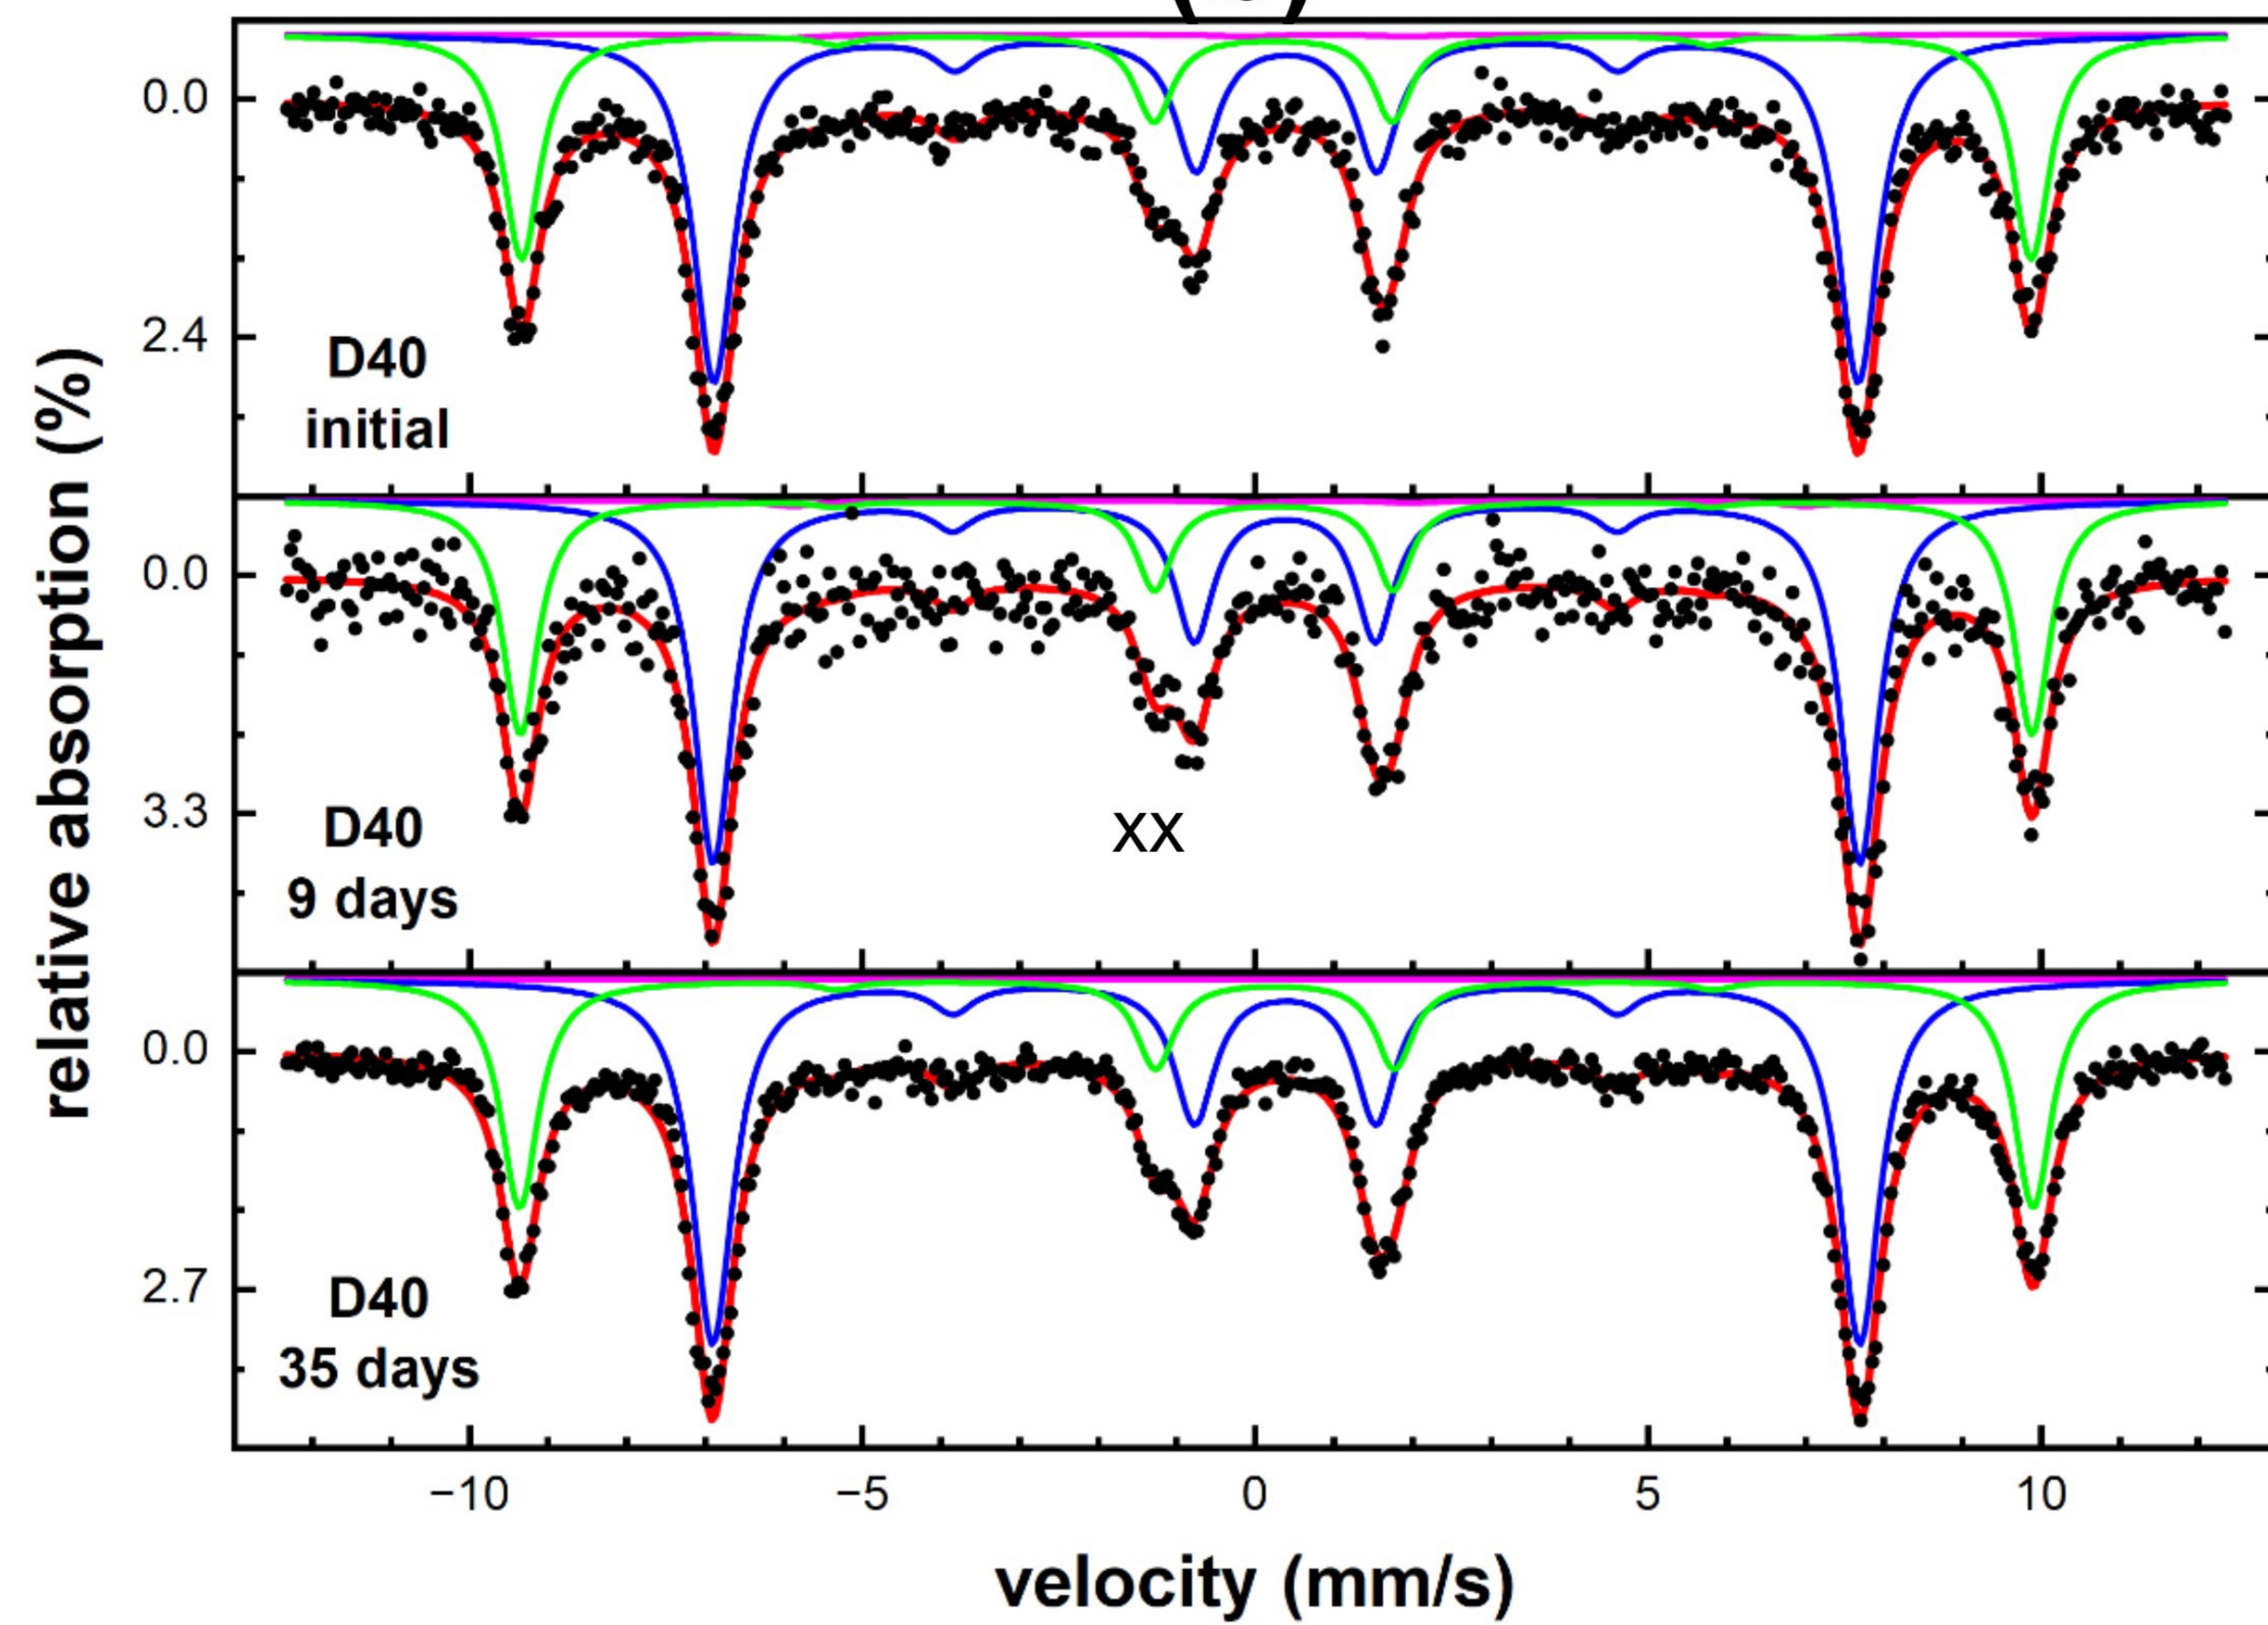

Supplement: d4cp01735h4.pdf [file d4cp01735h4.pdf]

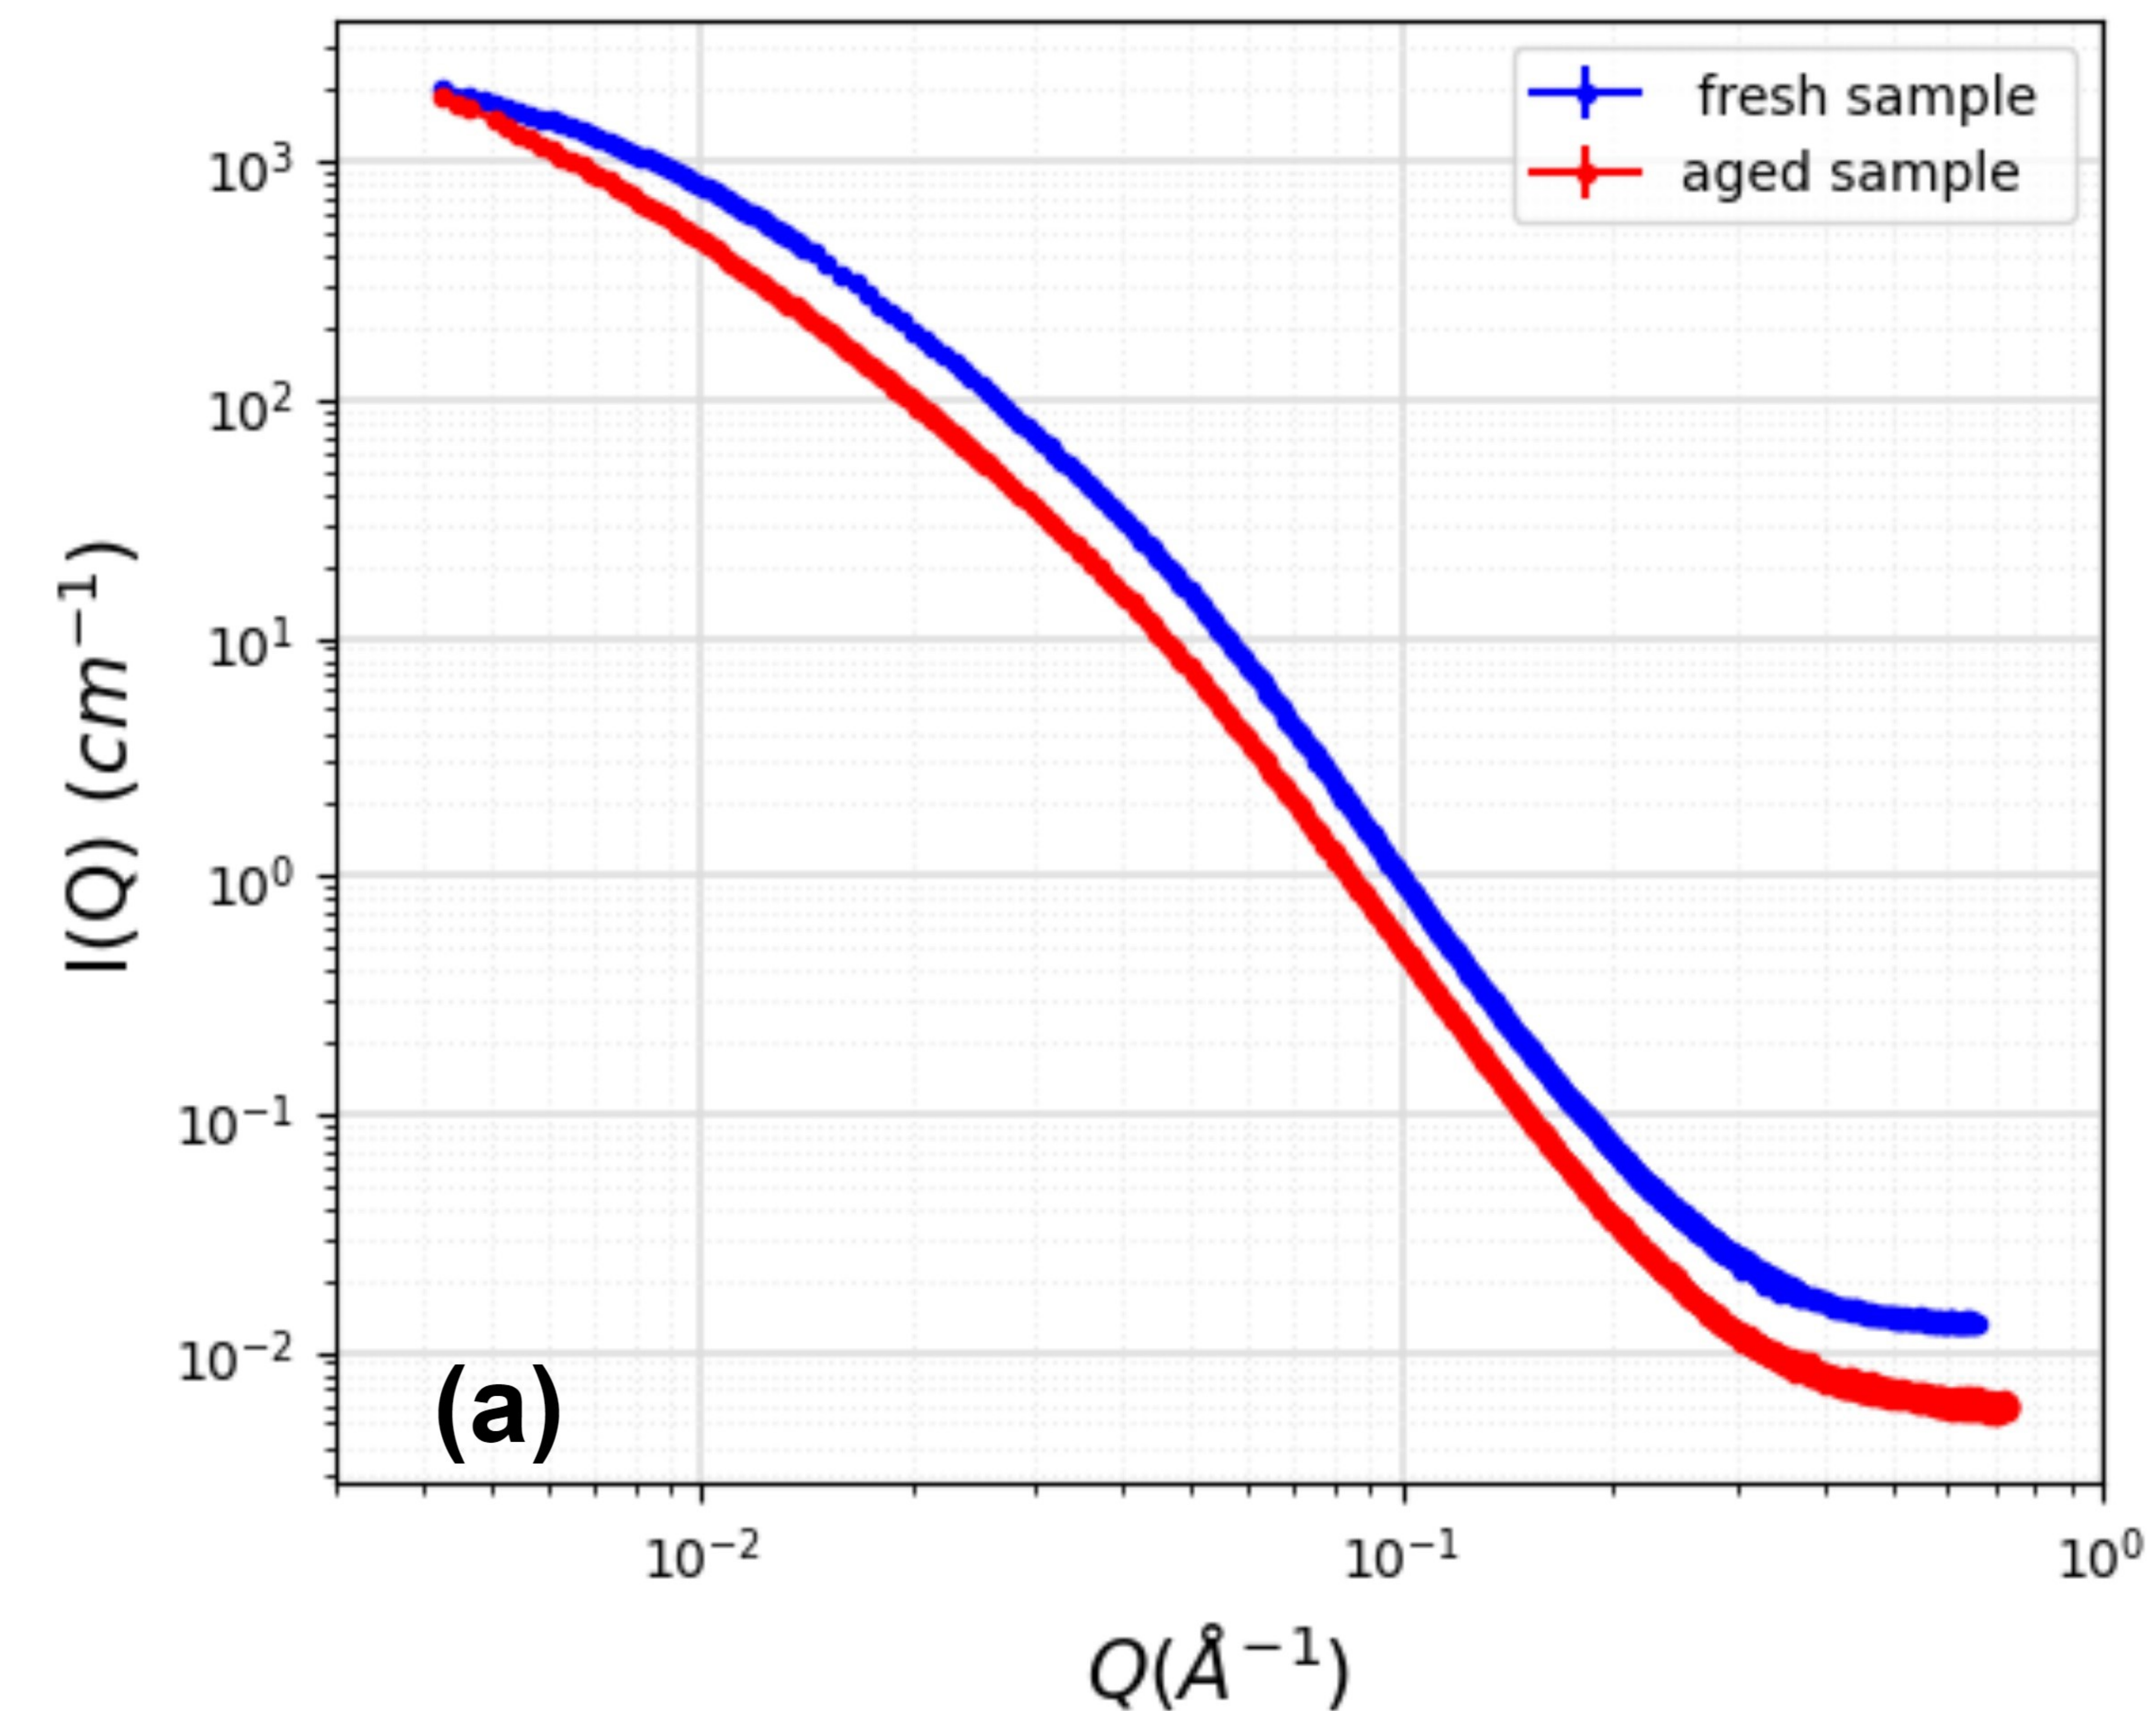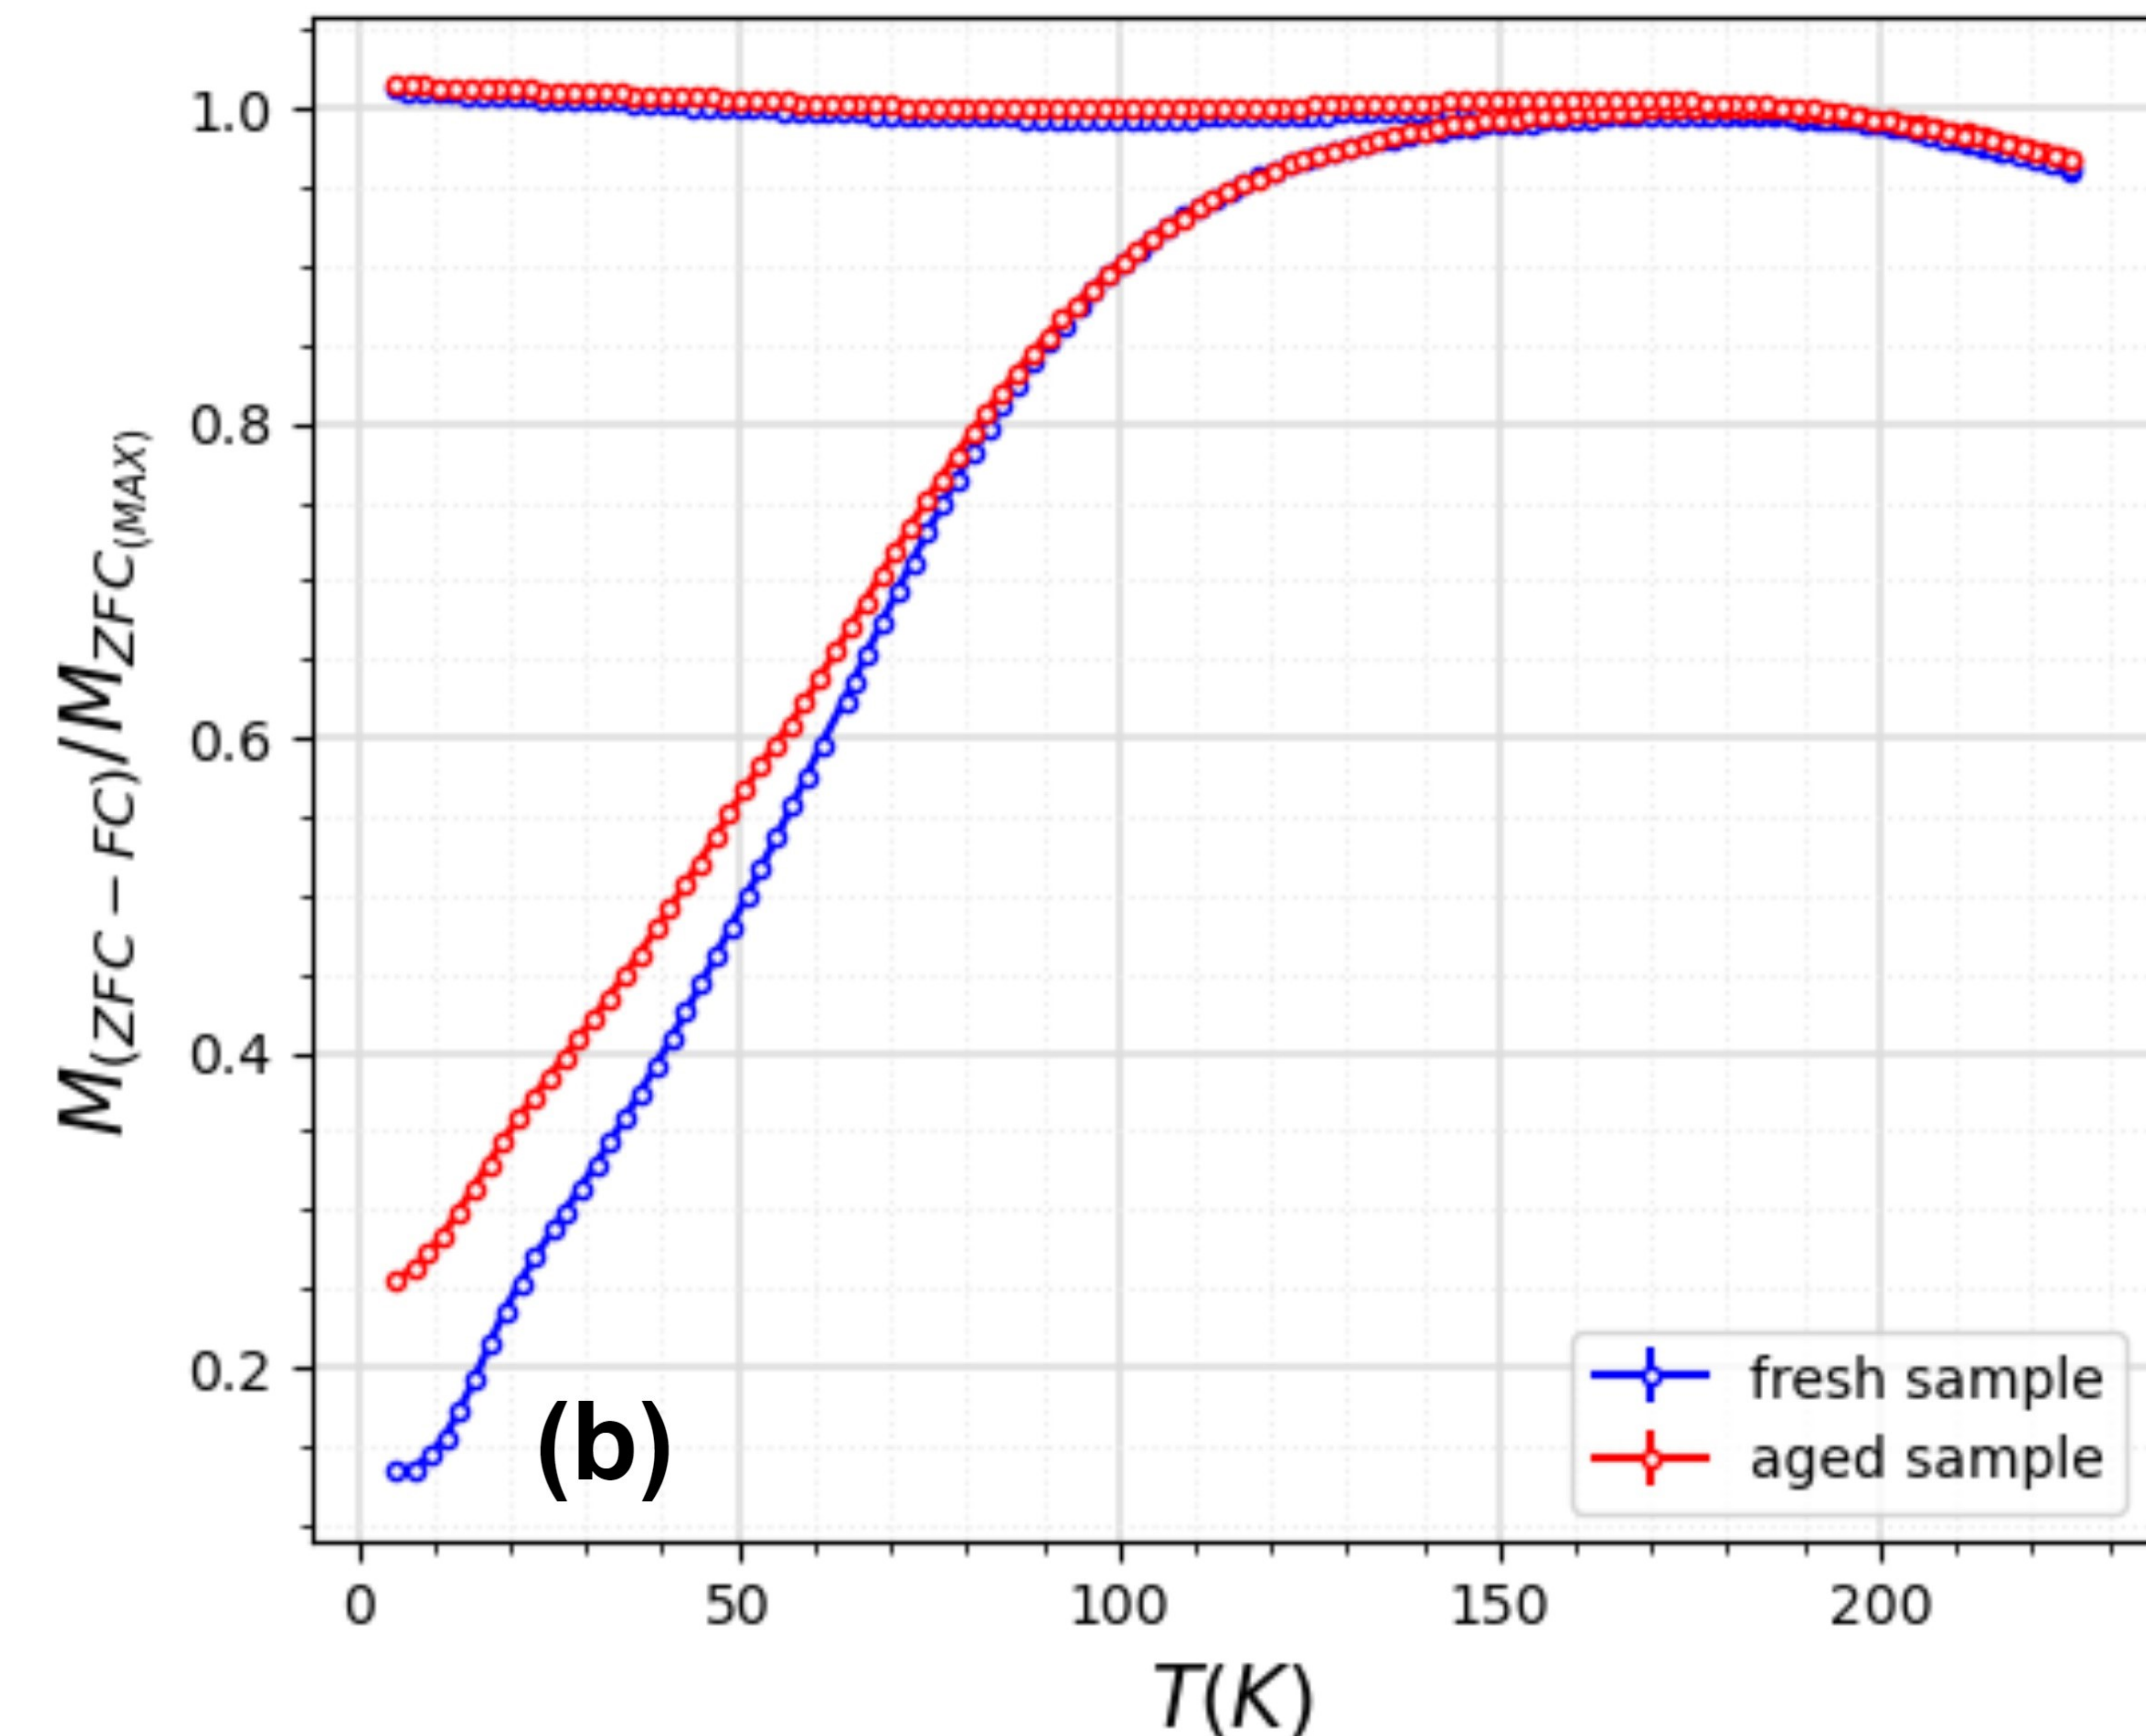

Supplement: d4cp01735h5.pdf [file d4cp01735h5.pdf]

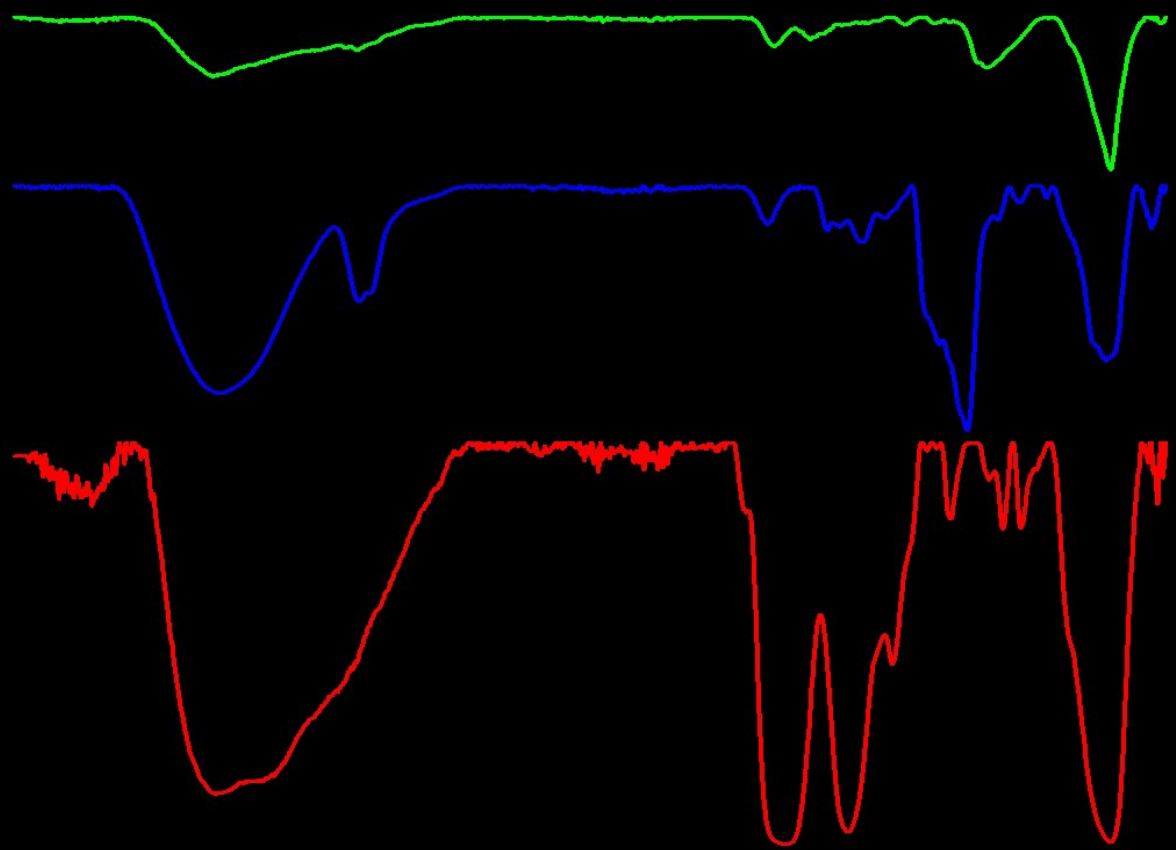

Supplement: d4cp01735h6.pdf [file d4cp01735h6.pdf]
